# Supplementary material for: Lipin‐2 regulates the antiviral and anti‐inflammatory responses to interferon
Source: PubMed Central journal article supplement — EMBO Rep. 2023 Nov 6;24(12):e57238. doi: 10.15252/embr.202357238 (PMC10702840; doi:10.15252/embr.202357238), 2023-11-06
Supplement: EMBR-24-e57238-s002.pdf [file EMBR-24-e57238-s002.pdf]

## Expanded View Figures

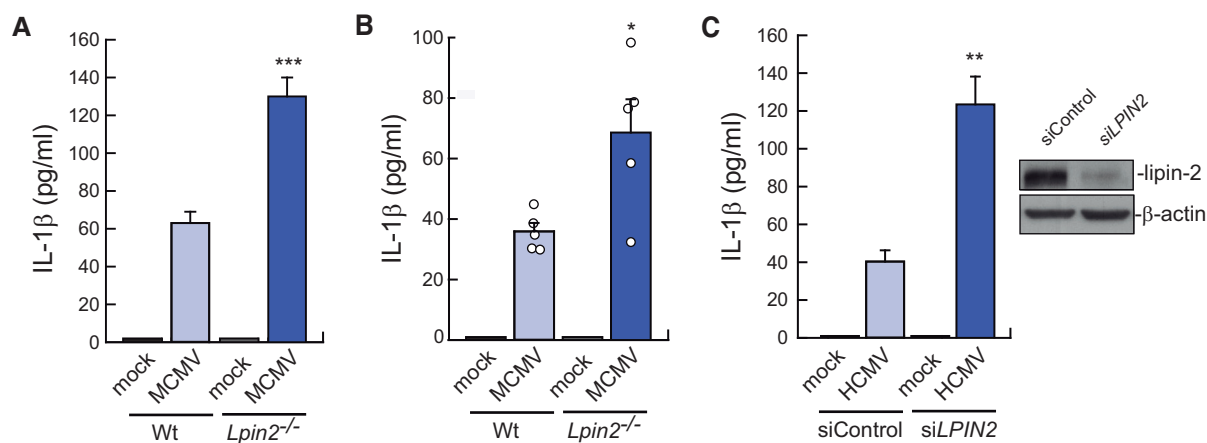

**Figure EV1. Lipin-2 effects on IL-1 $\beta$  production during cytomegalovirus infection.**

- A LPS-primed BMDMs from Wt or *Lpin2*<sup>-/-</sup> animals were mock infected or infected with MCMV (MOI = 2). IL-1 $\beta$  levels were measured in cell supernatants using a specific ELISA after 36 h of infection.
- B Wt ( $n = 5$ ) and *Lpin2*<sup>-/-</sup> ( $n = 5$ ) animals were intraperitoneally injected with MCMV ( $3.5 \times 10^6$  PFU per mouse) and IL-1 $\beta$  levels were evaluated in serum using specific ELISAs after 36 h of infection.
- C LPS-primed primary human macrophages, nucleofected with control siRNAs (siControl) or against *LPIN2* (siLPIN2), were mock infected or infected with HCMV (MOI = 5) for 36 h. IL-1 $\beta$  levels in cell supernatants were measured in cell supernatants using a specific ELISA. Right insert: lipin-2 expression in silenced cells by immunoblot.

Data information: Data shown are from biological triplicate samples and are expressed as means  $\pm$  SEM. \* $P < 0.05$ ; \*\* $P < 0.01$ , \*\*\* $P < 0.001$ , by Student's t-test.
