# Supplementary material for: Lipin‐2 regulates the antiviral and anti‐inflammatory responses to interferon
Source: PubMed Central journal article supplement — EMBO Rep. 2023 Nov 6;24(12):e57238. doi: 10.15252/embr.202357238 (PMC10702840; doi:10.15252/embr.202357238), 2023-11-06
Supplement: EMBR-24-e57238-s008.pdf [file EMBR-24-e57238-s008.pdf]

# Appendix

## Table of contents

|                         |   |
|-------------------------|---|
| Appendix Figure S1..... | 2 |
| Appendix Figure S2..... | 3 |
| Appendix Figure S3..... | 4 |
| Appendix Figure S4..... | 5 |
| Appendix Figure S5..... | 6 |
| Appendix Figure S6..... | 7 |
| Appendix Figure S7..... | 8 |
| Appendix Figure S8..... | 9 |

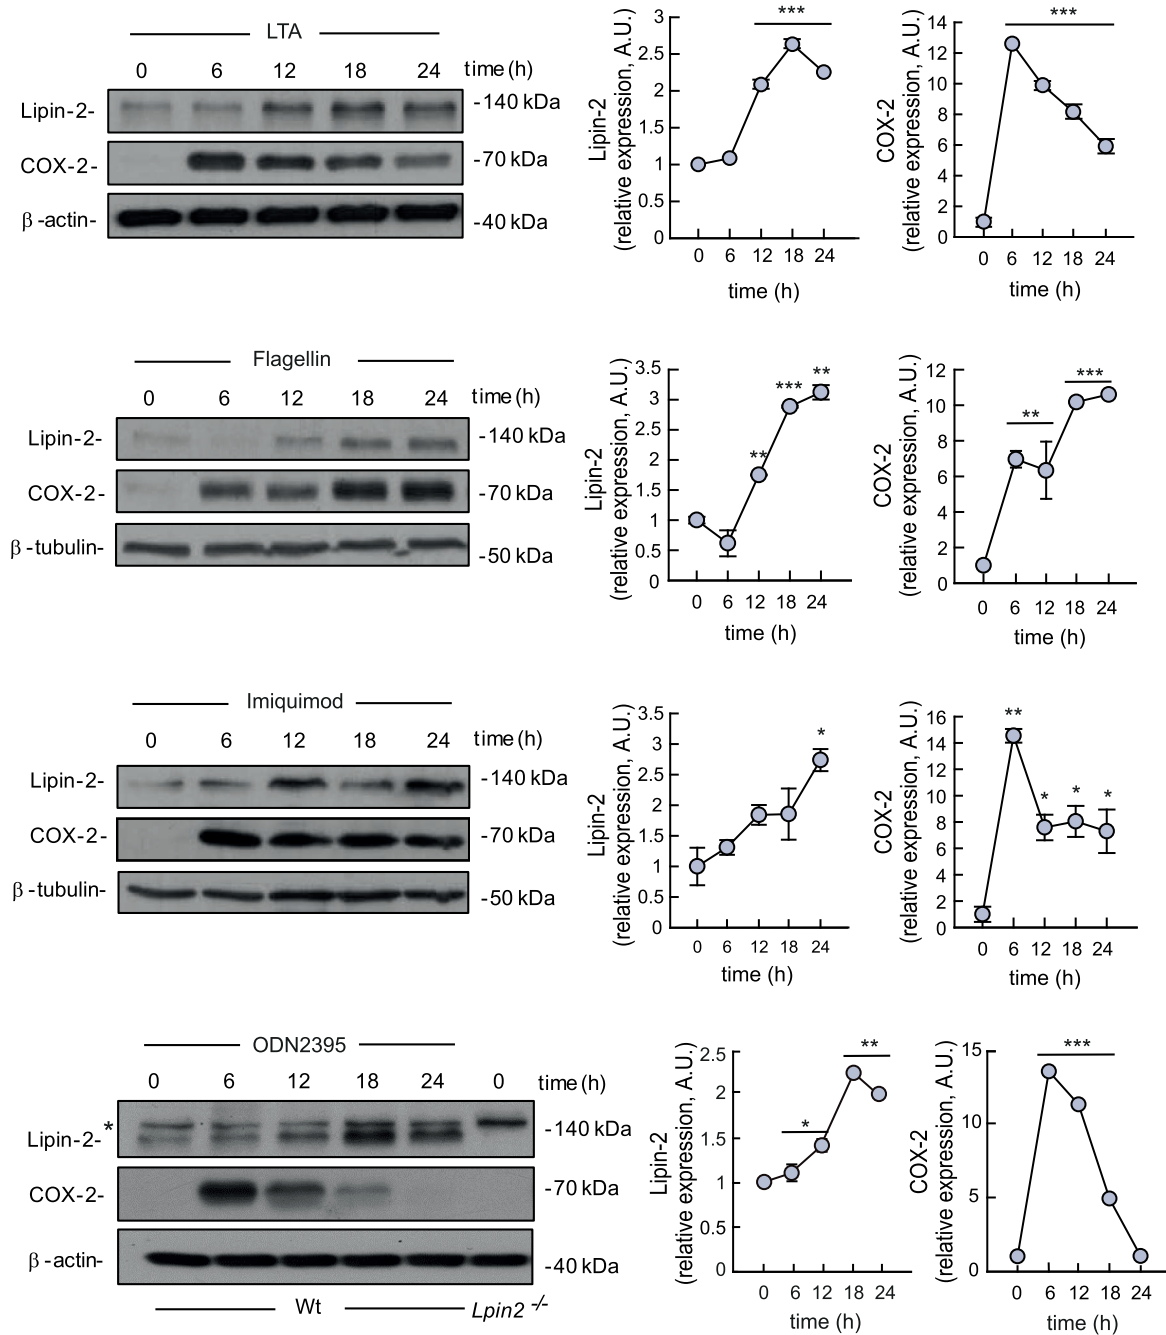

**Appendix Figure S1.** (continuation of Fig 1). *Effect of TLR agonists on lipin-2 expression.* BMDMs were treated with 1  $\mu$ g/ml LTA (TLR2), 50 ng/ml Flagellin (TLR5), 5  $\mu$ g/ml Imiquimod (TLR7) or 1  $\mu$ M ODN 2395 (TLR9) for the indicated periods of time. Cells lysates were analyzed by immunoblot using specific antibodies against lipin-2, COX-2, and  $\beta$ -actin or tubulin as loading controls. Quantifications of the bands from technical replicates are shown on the right. Shown are representative experiments of three ones. \*,  $P < 0.05$ , \*\*  $P < 0.01$ , \*\*\*  $< 0.001$ , by Student's t test.

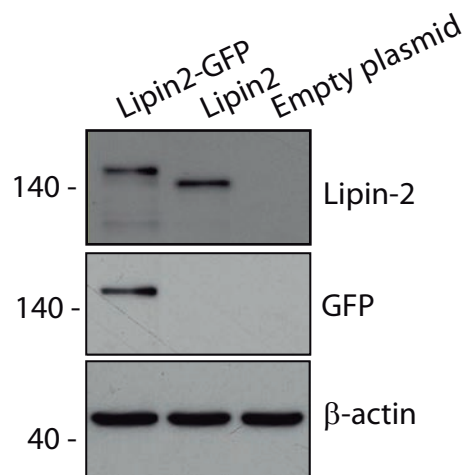

**Appendix Figure S2.** *Overexpression of lipin-2 in HEK-239 cells.* HEK-239 cells were transfected with 2  $\mu$ g of the plasmid mlipin-2-EGFP (Valdearcos et al., 2012, J. Biol. Chem. 287: 10894-10904) containing the murine sequence of lipin-2 fused with EGFP, a plasmid containing only the lipin-2 sequence or with an empty plasmid. Lysates were analyzed by immuno-blot using antibodies against lipin-2, GFP and  $\beta$ -actin.

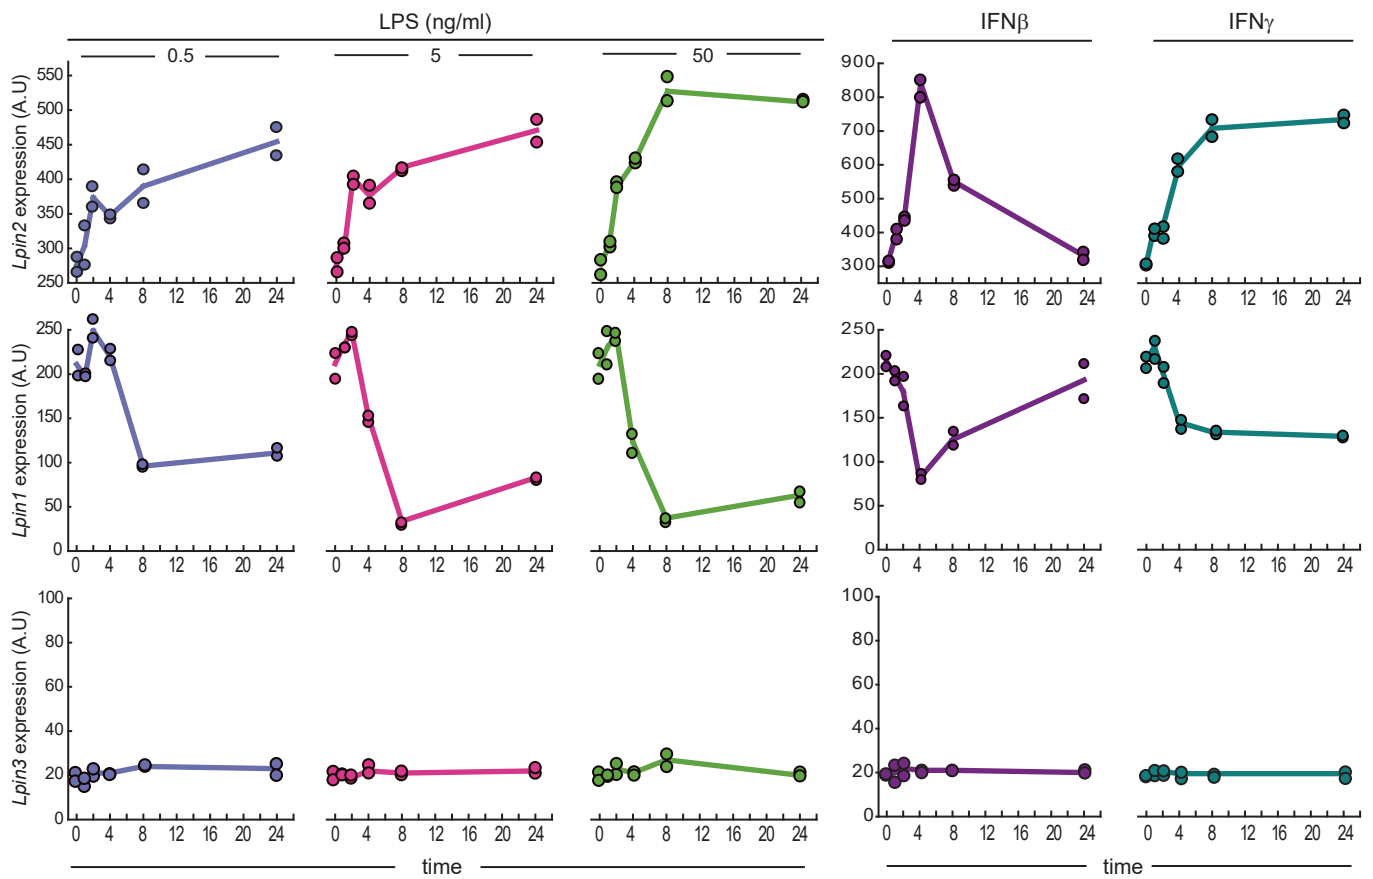

**Appendix Figure S3.** *Lpin* mRNA expression levels in activated BMDMs. BMDMs were treated with the indicated doses of LPS (left panels), or 10 U/ml of IFN $\beta$  or IFN $\gamma$  (right panels). Duplicate samples were collected at 0, 1, 2, 4, 8 and 24 h. mRNA levels for the indicated lipins were analyzed using Affymetrix Mouse Gene 1.1ST Array (GSE44292) (Raza et al., 2014, *J. Leukoc. Biol.* 96:167-183).

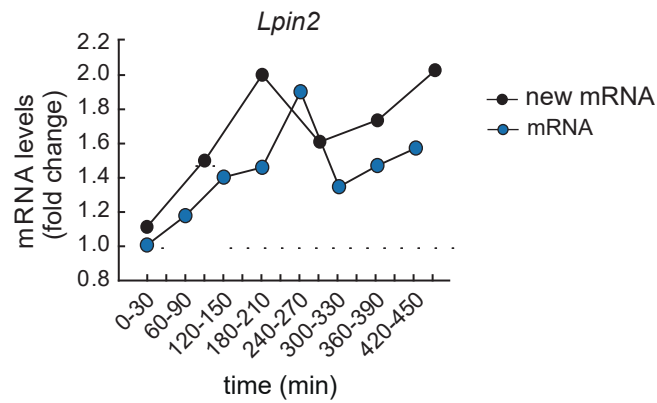

**Appendix Figure S4.** New synthesis of *Lpin2* mRNA induced by IFN- $\gamma$ . BMDMs were treated or not with 100 U/ml IFN- $\gamma$  at different time points and newly transcribed mRNA and total RNA was analyzed as described elsewhere (Dölken L et al., 2008, RNA, 14:1959-1972). Fold change of newly transcribed and total levels of *Lpin2* mRNA from stimulated cells is represented.

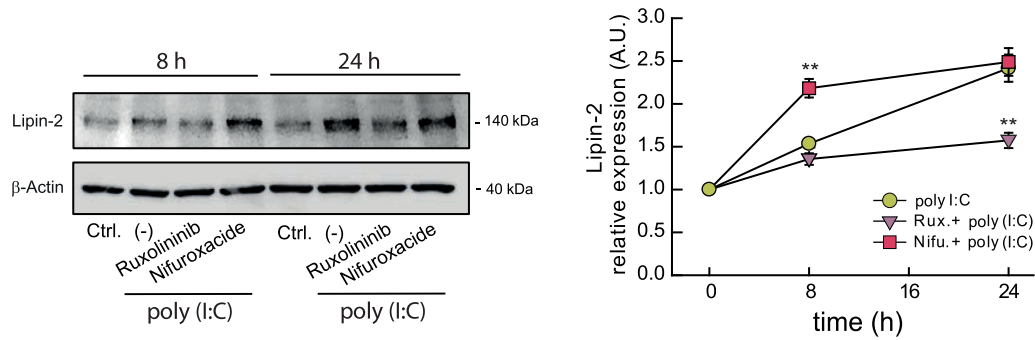

**Appendix Figure S5.** *Lipin-2* expression in cells treated with *poly(I:C)*. BMDMs were left untreated (Ctrl.) or stimulated with 25 mg/ml *poly(I:C)* in the presence or absence of 5 mM Ruxolitinib or 10 mM Nifuroxamide for the indicated periods of time. Protein was analyzed by Immunoblot using specific antibodies against lipin-2 or  $\beta$ -actin (loading control). Quantifications of the bands are shown on the right. Shown is a representative experiment of three ones (three biological samples). \*\*,  $P < 0.01$ , by Student's t test.

**Peak 1:** 71527697-71528898

CAGGAGTGTAGCTGGATAGGAGAAAGAACTTCTAGAGTTTTGACTGTGGTTGGCGTCAATTAATTGCATACTT  
AGAATTACTTGTAGACAAGATCACGAATGTTCCCTAAAACAAAGAACTAAACACAAGCCAGTTTTCTTCATTA  
TCATCACATCCTTAGAGATGTATTGAAATGTCATGCTATGTCACCTAAAAATTTACACTTTTGTGAGTTAATT  
AGAAATAAAGTATATCTTCCCCCAAACAGCTTTCAGAGTCCAGGAGTCCAGGATAGCTTTCAGCACCAC  
CAGTTACAAGCCGTGGGAACCTTACTTGAGTCACTCCTGTCTCCGTTGAATATAATTACAAAACGAGCTGGGTC  
TACTGTGGCGGTGCAGGAAACCCAGGCTGTCATCTGACCCAGGGAACATCAAAGCCAGGAACAGAAAAGCTGC  
TTTTCTAAAGTTTTCGTTCCCTACCTCACCTGTCTCAGAGCTGCCAGGCAGGAGGGTGTAGGAGCTTTCCCTC  
CTGACTCCAGAGAAAGCTCTCTTTCAGGAAATGAAAGACACATTTTTCTCCCTCTTGACTTGGGTGCTTTGGTGA  
TTTTAGAGTTTTGGGAAATAACAGACAGGAAGGAAACATCTTGCAGGCAACTTCTGCTTCTCATCTCCCCAGCA  
GACTTCCCCAAGACAAGTGGCATGCCTGCTGAATCTTGTAAAGAGGAGCGTGCAGGGAGAAATGTGGAAGCT  
AATATTTAAAAAGTTATCACACTGCAGAAGGACCGGCTGACGCACATAGAACGGGAGAGACAACCTGGAGCAAA  
AGGGGGCACTGCTTCTTGGGAGGTCACTCTTTGTATTGAAGGCAAAGGACTGGCAAGGACAGATCTGCCAAA  
CGAGGGTGGGTGGTTAGTATTACTGGCTGGAGGGATGGGAAGAAAGCTCTTTTGCCTTCTGGACTTTCAGAG  
AGATGGAGAGATTTACTGCAACTAGGGAGAGGTCGCAAATTTGGACAACCTGAAGAGGATATGACTTGTGCCTGT  
GGTAGCCATTCTTCAGAGAACTTTAGACAGTAGACATGCTGAGGTAGGGAGGGTGGACATGTGATGACAGTAC  
CGGAATTGAGACTCTTCCCTAGGTTTCCGACAAAGATGACTAAATGGTTGGTAGTGCCATTAGCTGGGATATG  
AGATTC

**Peak 2:** 71539873-71540425

CTAATTGTGCAAAATAACTGACTTTATCGAGGCATTTTTCTCATGATACTTTTGGCACATGGTTCACTCGGTTG  
TCTCTTGGAGACCTGCATGCCTGCCCGCTTGGCTATGTCTGATACTAGATGAGGGTGTGTGTTAAAGCATACC  
TGTTTGGAGACTGCGAGCTAAGGGCGAGTCACGGGGCAAAGGGAGACCTGAAAGTAACTTGTAGTGCTGTG  
GGGGAAGTGAAGTACTGATCTCACGTATAAAATAAAGCAGGGTGTCTAAACGGAGGCCCTGAGGGTTAGGAA  
TGGGAGTCAGCTTAGAGAATTGAAAGTGAAAAGGCAAAGAAGTATCTTGGGGAGAGCTCCTGTGTTTATATTTT  
TAGTGTGTCAATGTTTACTTGAAGGATTTTTTTTTTTAATATTTCAAGGAAACCATTTTTGTGTGCTTGCATAG  
ATTTCTTCCCTGACTCTTGCCTTCCCTAGCGACAATACGAGCAGTTTTTGTGCTGATAGTTGATAAAGTTAGG  
AGTGACTATTTTTGTGTGAATTCTAGTTCATGTTAATAAAA

**Peak 3:** 71541311-71541719

AGGGGATTCCAGAGGCTCTTGGCATTGTTGTCTGTTAGGATTGTCATTGGTGGACCCTTCGGTCGTTCTGGTAT  
GGCCTTTCAAGGACTTCCATGGTTTTCAGTTTATTGTTATAGCTCTTGAGATGAGGACTGGGGGATGCCACTAT  
GTCCAAGACCTCACCAGCTTTTAGAGAAGTACTGAGTATTTCTGTGGGATGCCTCACTGTAAGTTTTCTTATT  
GCTTTCTCATGATAAGACTGGGTTATGACTAAGGAAGACCACAGAGGGTAAAGTACCTTGTGACTCATGGTGG  
TCATGGCCTTGATCAACAGCAGTTTGGAGTTGTGTGTTTTCAGATTTTTCTCTACTGACAACCTAATTTGTATT  
TTTTCTATGTATAAGAAGTTTGTAGGGGGGTCGTAAGGGGGG

**Appendix Figure S6.** *ISRE and GAS sequences present in Stat1 peaks in the Lpin2 gene.* DNA sequence motifs recognized by Stat1 in peaks 1, 2 and 3 called by MACS during Chip-Seq analysis were determined by the presence of ISRE (GAAANNGAAA, green) or GAS (TTCNNNGAA or TTCNNNGAA, grey) consensus motifs within a 100-bp region centered on the peak summit. Notice that in peak 2 a GAS consensus motif was also found at 128-bp from the center of the peak.

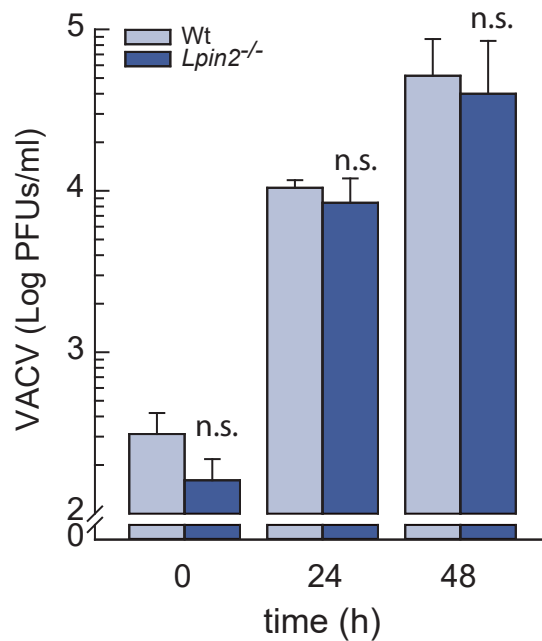

**Appendix Figure S7.** Infection of BMDMs with VACV is not affected by lipin-2 expression levels. BMDMs from Wt or *Lpin2*<sup>-/-</sup> animals were infected with VACV (MOI = 0.01, Western Reserve strain). Cells were harvested at the indicated time points and virus yields were determined by plaque assay in BSC40 cells. Results represent the mean  $\pm$  SD of three independent experiments. *P* values were calculated by two-tailed t test assuming non-equal variance. No statistical differences (n.s.) were found between Wt and lipin-2 –deficient macrophages.



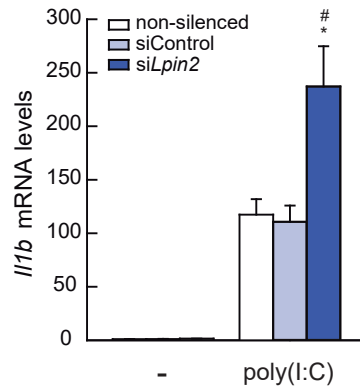

**Appendix Figure S8.** *Effect of lipin-2 on Il1b expression in RAW264.7 macrophages.* RAW264.7 macrophages were left untreated (non-silenced), or silenced with control siRNAs (siControl) or against *Lpin2* (siLpin2). After 48 h, cells were left untreated (-) or activated with 25  $\mu$ g/ml poly(I:C). *Il1b* mRNA levels were analyzed by qPCR, using *Gapdh* as reference. Data from triplicate biological samples are represented as mean  $\pm$  SE. \*,  $P < 0.05$ , #,  $P < 0.05$ , by Student's t test. \*, siLpin2 vs siControl. #, siLpin2 vs non-silenced cells.
